# Supplementary material for: Diverse cis factors controlling Alu retrotransposition: What causes Alu elements to die?
Source: HighWire-hosted journal article supplement (doi:10.1101/gr.089789.108), 2009-03-09
Supplement: Supplemental_Figure_1.pdf [file Supplemental_Figure_1.pdf]

## Supplemental Figure

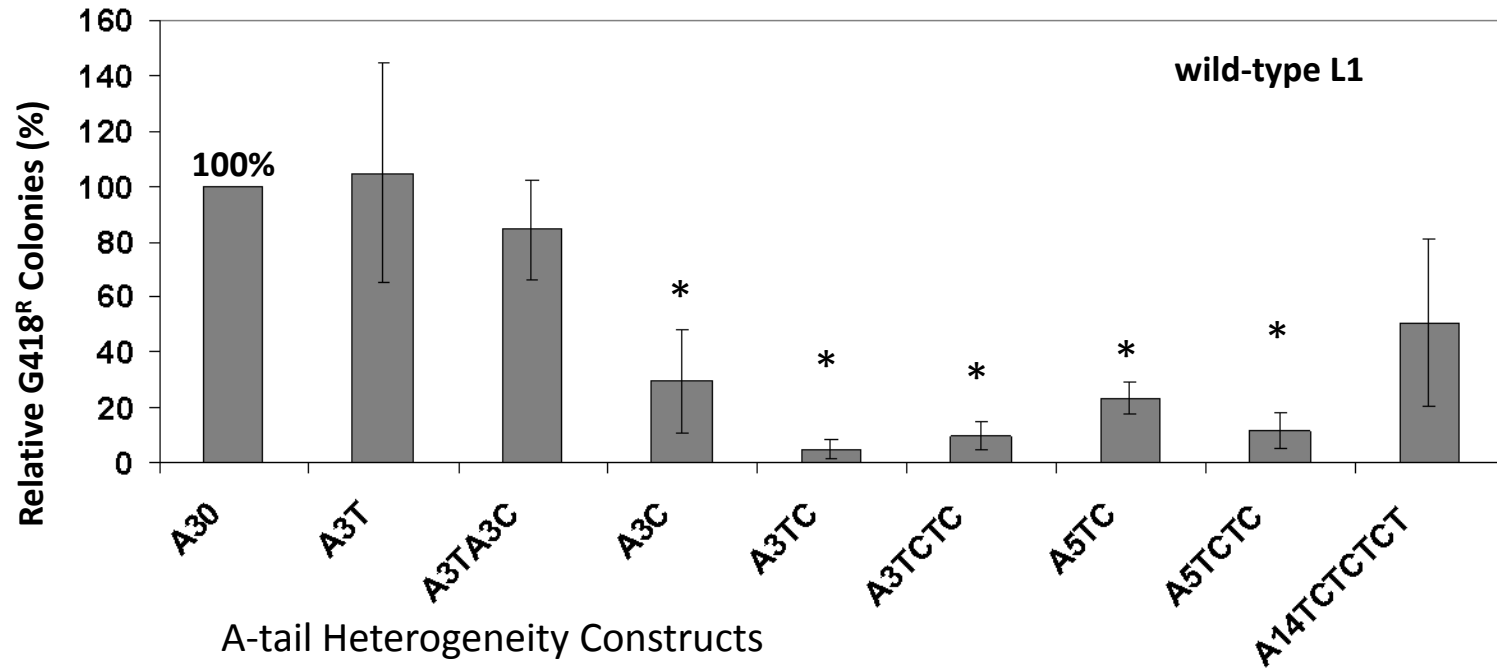

**Figure 1S.** The retrotransposition activity of *Alu* elements with different heterogeneous A-tails driven by a wild-type L1 (JM101/L1.3 no tag (Wei et al 2000)) was evaluated. Columns represent the mean G418 resistant colony normalized relative to the *Alu* with 30 homogenous As (arbitrarily designated as 100%) with the standard deviation shown as error bars. \* indicates a significant difference  $p < 0.05$  (Student paired t-TEST) relative to the control (A30),  $n=3$ .
